# Supplementary material for: Smaug1 membrane-less organelles respond to AMPK and mTOR and affect mitochondrial function
Source: Oxford University Press journal article supplement (doi:10.1242/jcs.253591), 2021-12-03
Supplement: jcs253591supp.pdf [file jcs253591supp.pdf]

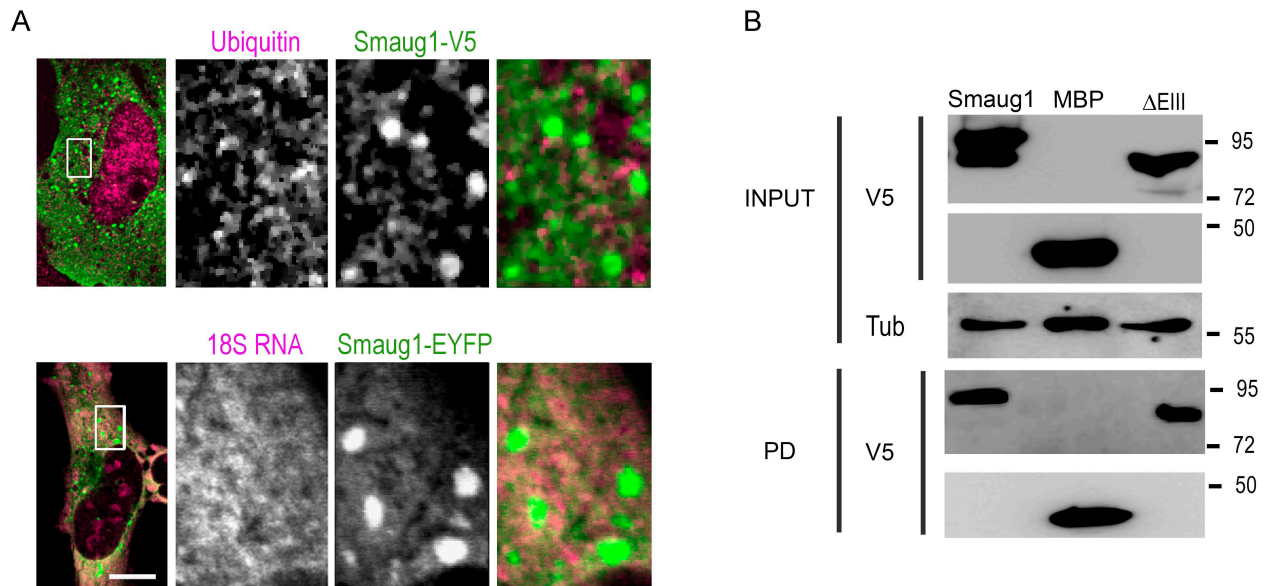

**Fig. S1. A. Smaug1-EYFP bodies exclude ubiquitin and small ribosomal subunits (linked to Figure 1C).** Top, Smaug1-V5-transfected U2OS cells were immunostained for V5 and ubiquitin. Bottom, FISH with a ribosomal 18S riboprobe was performed in Smaug1-EYFP-transfected cells as described in Materials and Methods. Representative images from two independent stainings are shown in each case. Both ubiquitin and 18S rRNA are excluded from Smaug1-EYFP bodies.

**B. Expression levels and recovery of Smaug1 constructs (linked to Figure 1D).** Expression levels of the indicated constructs tagged with MBP-V5 and their recovery after pull-down were analyzed by western blot using an anti-V5 antibody. Tubulin was used as loading control for the input samples.

**A**

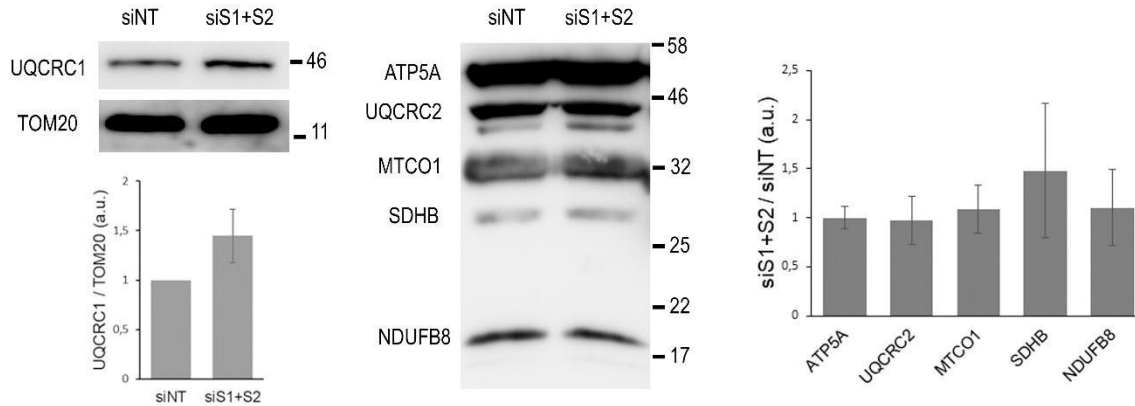

**B**

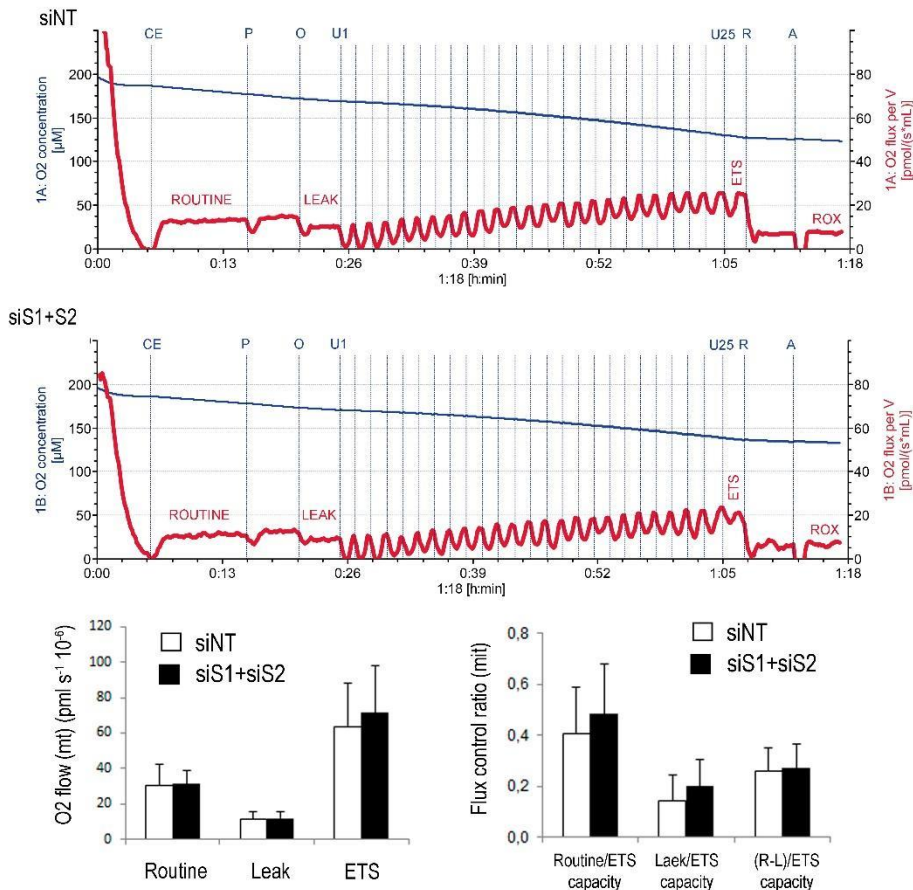

**Fig. S2. A Expression levels of mitochondrial enzymes upon Smaug1+2 knockdown.** The indicated proteins were analyzed by western blot of mitochondrial protein extracts obtained as described in Materials and Methods. Three independent experiments were performed and the media value is plotted. A representative image is shown. Error bars, standard deviation.

**B. Respiratory capacity of Smaug1+2 knockdown U2O2 cells (linked to Figure 2C)** U2OS were treated with non-targeting (NT) siRNA or with siRNAs against both Smaug1 and Smaug2 (siS1+S2) and respiration in intact cells ( $1 \times 10^6$  cells/mL) was examined in growth medium at 37 °C as described in Materials and Methods. Oxygen flow ( $\text{pmol O}_2 \times \text{s}^{-1} \times 10^{-6}$  cells) and total oxygen concentration (nmol/mL) in the Oxygraph chamber are indicated as red and blue traces, respectively. CE: cellular substrate, P: Pyruvate, O: Oligomycin, U: Uncoupler (CCCP) R: Rotenone, A: Antimycin A. After measuring routine oxygen consumption, the adenosine triphosphate (ATP)-synthase inhibitor oligomycin was added to evaluate proton LEAK. The uncoupler carbonyl cyanide m-chlorophenylhydrazone (CCCP) allowed the measurement of maximal oxygen consumption (Max) stimulating maximal respiration assuming all required substrates are present. Finally, rotenone (complex I inhibitor) and antimycin A (complex III inhibitor), which completely prevent oxygen consumption through the ETC were added. Oxygen flow per cell was corrected for ROX at the indicated mitochondrial respiration state. Calculated mitochondrial (mt) flux control ratios show basal cellular routine respiration (R), leak respiration (L) and fraction of respiration ( $\text{netR} = \text{R}-\text{L}$ ) used for ATP production normalized to ETS capacity.

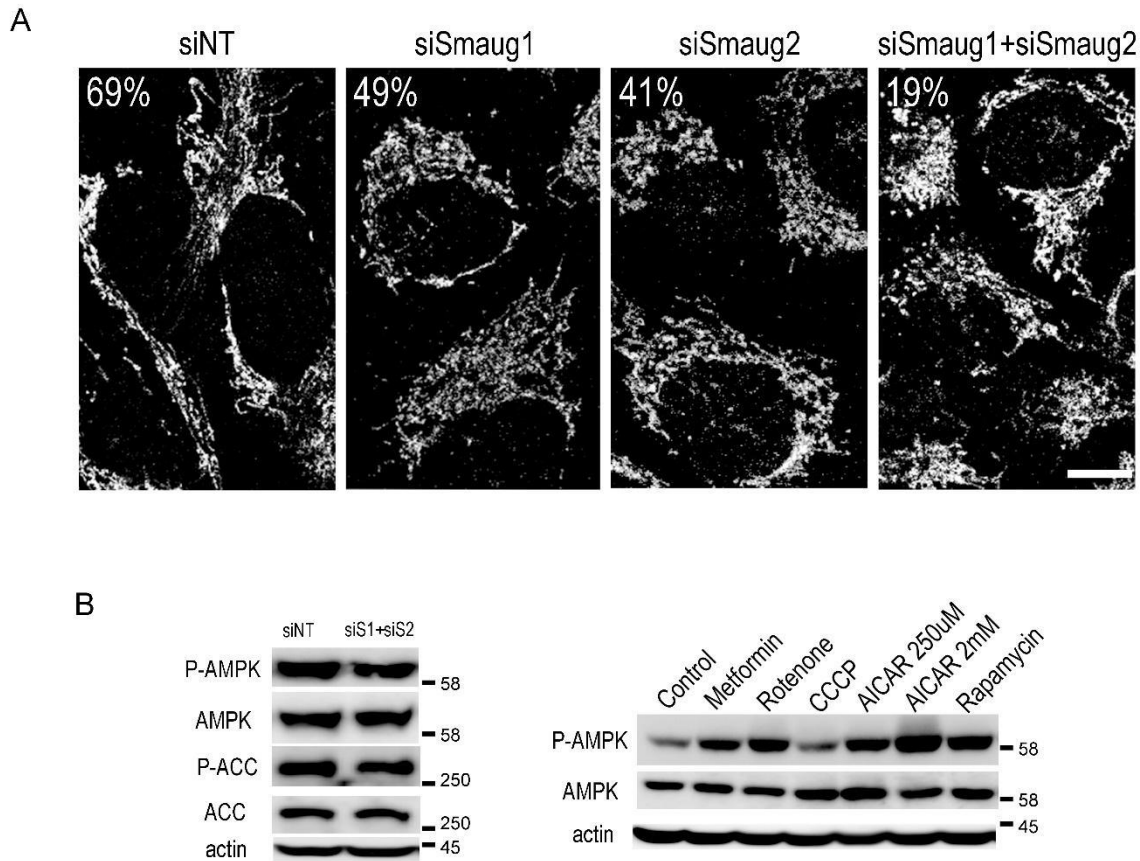

**Fig. S3. A Mitochondrial network disruption upon Smaug1 and Smaug2 knockdown (linked to Figure 3A).** U2OS cells were treated with the indicated siRNAs and live-stained with MitoTracker™ Red CMXRos. At least 200 cells per treatment were analyzed and the percentage of cells with elongated mitochondria is indicated. A representative experiment out of three is shown. Scale bars, 10  $\mu$ m.

**B. Phosphorylation levels of AMPK and ACC remained unchanged upon Smaug1+2 knockdown.** U2OS cells were treated with the indicated siRNAs or exposed to metformin, AICAR or rapamycin. Whole cell protein extracts were obtained by lysis with 1XSDS loading buffer as described in Materials and Methods. Phosphorylation of AMPK $\alpha$  and of its target ACC, and their total protein levels were analyzed by western blot. Three independent experiments were performed and a representative western blot is shown.

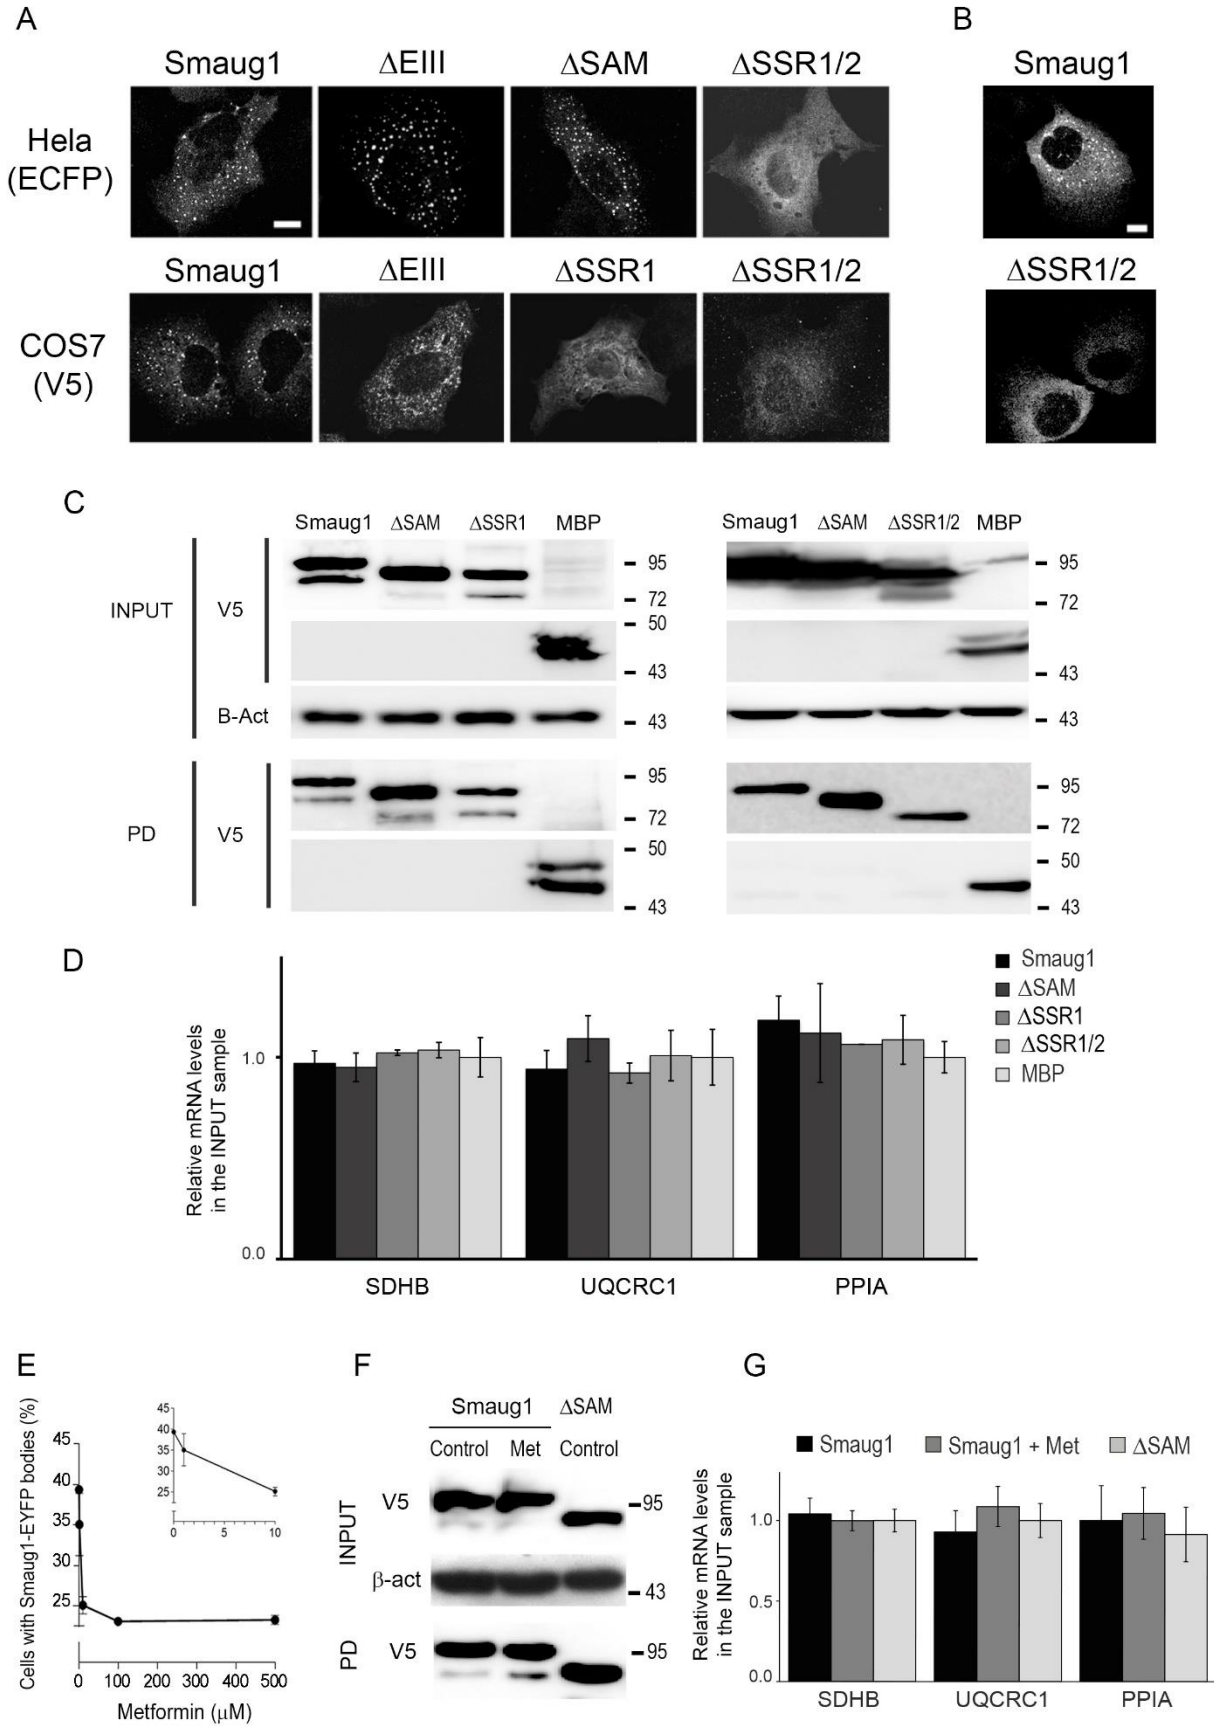

**Fig. S4. A Smaug-MLO formation in COS7 and HeLa cells (linked to Figure 5D).** Representative images of cells transfected with the indicated constructs tagged with V5-SBP or ECFP are shown. At least two independent transfection experiments were performed in each case.

**B Smaug MLO formation in tethering assay (linked to Figure 6B).** U2Os cells were co-transfected with the firefly reporter carrying a tandem array of 6 MS2 binding sites and the indicated constructs tagged with MS2-HA. Three independent experiments were performed and representative cells are depicted .

**C,D Expression levels of Smaug1 constructs and target mRNAs (linked to Figure 6C).** (C) Expression levels of the indicated constructs tagged with MBP-V5 and their recovery after pull-down were analyzed by western blot using anti-V5 antibody.  $\beta$ -actin was used as loading control for the input samples. (D) Levels of the indicated transcripts in the input samples depicted in Figure 6C were determined by RT-qPCR and normalized to RpLp0 mRNA values.

**E Response to metformin in U2OS cells.** Cells transfected with Smaug1-EYFP were exposed during 1 h at the indicated metformin concentrations. More than 100 cells from duplicate coverslips were analyzed for each experimental point. Error bars, standard deviation.

**F,G Expression levels of Smaug1 constructs and of target mRNAs upon metformin treatment (linked to Figure 8C).** (F) Western blot of input and pull-down (PD) samples depicted in Figure 8C. (G) Levels of the indicated transcripts in the input samples depicted in Figure 8C were determined by RT-qPCR and normalized to RpLp0 mRNA values.



### Table S1. A putative mitochondrial regulon linked to Smaug

Chen et al. (2014) reported 340 transcripts bound to Smaug and 1918 mRNAs translationally repressed by Smaug in Drosophila embryos (additional data files 2 and 7 in (Chen et al., 2014)). Among these Smaug targets, several mRNAs are linked to mitochondrial function. In addition, Chartier et al. (2015) reported that mRNAs of TCE components are bound to Drosophila Smaug in adult thorax (Chartier et al., 2015).

| Function                                         | Name                                                                                                       |                   | REF                                             |
|--------------------------------------------------|------------------------------------------------------------------------------------------------------------|-------------------|-------------------------------------------------|
| ETC                                              | SDHB                                                                                                       | bound             | mammalian U2OS cells (this work)                |
| ETC                                              | UQCRC1                                                                                                     | bound, repressed? | mammalian U2OS cells (this work)                |
| ACYL-CoA DEHYDROGENASES                          | Butyryl-CoA dehydrogenase;DmelCG6638;ortholog                                                              | bound, repressed  | Drosophila embryo (Chen et al., 2014)           |
| alpha-amino acid metabolic process               | Probable methylmalonate-semialdehyde dehydrogenase [acylating], mitochondrial;FlyBase:FBgn0023537;ortholog | bound, repressed  | Drosophila embryo (Chen et al., 2014)           |
| ETC                                              | Succinate dehydrogenase [ubiquinone] flavoprotein subunit, mitochondrial;sdhA;ortholog                     | bound, repressed  | Drosophila embryo (Chen et al., 2014)           |
| ETC                                              | Ferredoxin, mitochondrial;Fcd;ortholog                                                                     | bound, repressed  | Drosophila embryo (Chen et al., 2014)           |
| ETC and OXPHOS                                   | BcDNA, GH02220;OXAL1;ortholog                                                                              | bound, repressed  | Drosophila embryo (Chen et al., 2014)           |
| fatty acid beta-oxidation                        | GH06693p;15207b;at;ortholog                                                                                | bound, repressed  | Drosophila embryo (Chen et al., 2014)           |
| fatty acid catabolic process                     | Arc42;Arc42;ortholog                                                                                       | bound, repressed  | Drosophila embryo (Chen et al., 2014)           |
| Iron-sulfur cluster assembly-ETC related process | Cysteine desulfurase, mitochondrial;Nfs1;ortholog                                                          | bound, repressed  | Drosophila embryo (Chen et al., 2014)           |
| misc                                             | RE8077p;ENIP3;ortholog                                                                                     | bound, repressed  | Drosophila embryo (Chen et al., 2014)           |
| misc                                             | ATG11 domain-containing protein;Atg17;ortholog                                                             | bound, repressed  | Drosophila embryo (Chen et al., 2014)           |
| mitochondrial translation                        | Mitochondrial ribosomal protein L33;mrpL33;ortholog                                                        | bound, repressed  | Drosophila embryo (Chen et al., 2014)           |
| mitochondrial translation                        | Probable 26S ribosomal protein S25, mitochondrial;mrpS25;ortholog                                          | bound, repressed  | Drosophila embryo (Chen et al., 2014)           |
| mitochondrial translation                        | CG6469 protein;P32;ortholog                                                                                | bound, repressed  | Drosophila embryo (Chen et al., 2014)           |
| mitochondrial translation                        | Mitochondrial ribosomal protein L53;mrpL53;ortholog                                                        | bound, repressed  | Drosophila embryo (Chen et al., 2014)           |
| OxPhos                                           | ATP synthase subunit beta, mitochondrial;ATP5b;ortholog                                                    | bound, repressed  | Drosophila embryo (Chen et al., 2014)           |
| OxPhos                                           | ATP synthase subunit alpha, mitochondrial;blw;ortholog                                                     | bound, repressed  | Drosophila embryo (Chen et al., 2014)           |
| protein import                                   | Mitochondrial import inner membrane translocase subunit TIM44;CG117798;ortholog                            | bound, repressed  | Drosophila embryo (Chen et al., 2014)           |
| protein import                                   | CHCH domain-containing protein;DmelCG7950;ortholog                                                         | bound, repressed  | Drosophila embryo (Chen et al., 2014)           |
| pyruvate metabolic process                       | Pyruvate dehydrogenase E1 component subunit beta;Pdhb;ortholog                                             | bound, repressed  | Drosophila embryo (Chen et al., 2014)           |
| Redox homeostasis                                | Thioredoxin domain-containing protein;DmelCG8983;ortholog                                                  | bound, repressed  | Drosophila embryo (Chen et al., 2014)           |
| TCA                                              | Iso_dh domain-containing protein;DmelCG5026;ortholog                                                       | bound, repressed  | Drosophila embryo (Chen et al., 2014)           |
| tRNA metabolism                                  | Tryptophanyl-tRNA synthetase e-TrpRS-m;ortholog                                                            | bound, repressed  | Drosophila embryo (Chen et al., 2014)           |
| channel                                          | Voltage-dependent anion-selective channel;parin;ortholog                                                   | bound             | Drosophila embryo (Chen et al., 2014)           |
| ETC                                              | GH01077p;UQCR-C3;ortholog                                                                                  | bound             | Drosophila embryo (Chen et al., 2014)           |
| ETC                                              | AT02348p;UQCR-C2;ortholog                                                                                  | bound             | Drosophila embryo (Chen et al., 2014)           |
| ETC                                              | GE011443p;1;UQCR-6;ortholog                                                                                | bound             | Drosophila embryo (Chen et al., 2014)           |
| fatty acid beta-oxidation                        | Uncharacterized protein;DmelCG9146;ortholog                                                                | bound             | Drosophila embryo (Chen et al., 2014)           |
| fatty acid beta-oxidation                        | F10602p;GH07925p;ortholog                                                                                  | bound             | Drosophila embryo (Chen et al., 2014)           |
| metabolic enzyme                                 | Aspartate aminotransferase;Gat2;ortholog                                                                   | bound             | Drosophila embryo (Chen et al., 2014)           |
| misc                                             | NFU1 iron-sulfur cluster scaffold homolog, mitochondrial;FlyBase:FBgn0052657;ortholog                      | bound             | Drosophila embryo (Chen et al., 2014)           |
| mitochondrial organization                       | Coiled-coil-helix-coiled-coil-helix domain containing 2, isoform A;Chchd2;ortholog                         | bound             | Drosophila embryo (Chen et al., 2014)           |
| mitochondrial translation                        | RH08993p;BcDNA;RH08992;ortholog                                                                            | bound             | Drosophila embryo (Chen et al., 2014)           |
| mitochondrial translation                        | 38S ribosomal protein L22, mitochondrial;mrpL22;ortholog                                                   | bound             | Drosophila embryo (Chen et al., 2014)           |
| mitochondrial translation                        | Mitochondrial ribosomal protein S2, mrpS2;ortholog                                                         | bound             | Drosophila embryo (Chen et al., 2014)           |
| OxPhos                                           | Cytochrome c oxidase subunit 7A, mitochondrial;COX7A;ortholog                                              | bound             | Drosophila embryo (Chen et al., 2014)           |
| OxPhos                                           | RES7459p;CG6922;ortholog                                                                                   | bound             | Drosophila embryo (Chen et al., 2014)           |
| protein import                                   | Heat shock protein 60A;Hsp60A;ortholog                                                                     | bound             | Drosophila embryo (Chen et al., 2014)           |
| protein import                                   | Mitochondrial import inner membrane translocase subunit TIM50-C;ttm50;ortholog                             | bound             | Drosophila embryo (Chen et al., 2014)           |
| protein import                                   | DNL-type domain-containing protein;DmelCG9206;ortholog                                                     | bound             | Drosophila embryo (Chen et al., 2014)           |
| pyruvate metabolic process                       | Pyruvate carboxylase;PCB;ortholog                                                                          | bound             | Drosophila embryo (Chen et al., 2014)           |
| TCA                                              | Probable isocitrate dehydrogenase [NAD] subunit alpha, mitochondrial;idh3a;ortholog                        | bound             | Drosophila embryo (Chen et al., 2014)           |
| ETC complex I                                    | NADH dehydrogenase (ubiquinone) 24 kDa subunit                                                             | bound             | Drosophila adult thorax (Chartier et al., 2015) |
| ETC complex I                                    | NADH dehydrogenase (ubiquinone) 8S subunit                                                                 | bound             | Drosophila adult thorax (Chartier et al., 2015) |
| ETC complex I                                    | NADH dehydrogenase (ubiquinone) 7S kDa subunit                                                             | bound             | Drosophila adult thorax (Chartier et al., 2015) |
| ETC complex II                                   | Succinate dehydrogenase, subunit B (iron-sulfur)                                                           | bound             | Drosophila adult thorax (Chartier et al., 2015) |
| ETC complex II                                   | Succinate dehydrogenase, subunit A (flavoprotein)                                                          | bound             | Drosophila adult thorax (Chartier et al., 2015) |
| ETC complex II                                   | Succinate dehydrogenase, subunit D                                                                         | bound             | Drosophila adult thorax (Chartier et al., 2015) |
| ETC complex III                                  | Rieske iron-sulfur protein                                                                                 | bound             | Drosophila adult thorax (Chartier et al., 2015) |
| ETC complex III                                  | Ubiquinol-cytochrome c reductase                                                                           | bound             | Drosophila adult thorax (Chartier et al., 2015) |
| ETC complex IV                                   | Cytochrome c oxidase subunit 7C                                                                            | bound             | Drosophila adult thorax (Chartier et al., 2015) |
| ETC complex IV                                   | Cytochrome c oxidase subunit 7A                                                                            | bound             | Drosophila adult thorax (Chartier et al., 2015) |
| ETC complex V                                    | ATP synthase, beta subunit                                                                                 | bound             | Drosophila adult thorax (Chartier et al., 2015) |
| ETC complex V                                    | ATP synthase, subunit F                                                                                    | bound             | Drosophila adult thorax (Chartier et al., 2015) |

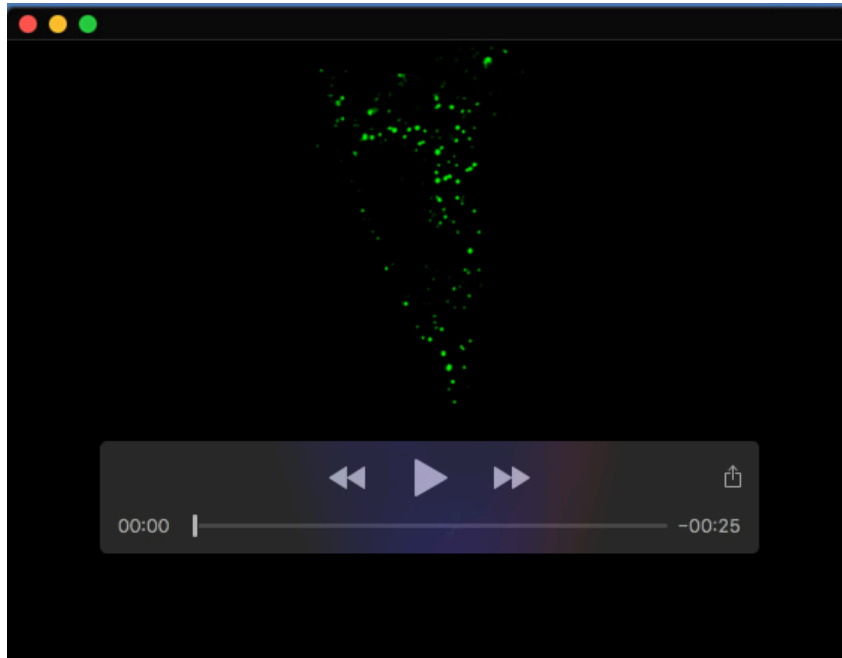

**Movie 1.** Live cell imaging of the Smaug1-EYFP expressing cell depicted in Figure 1A recorded during 30 min (0.5 frames per minute) as described in Materials and Methods.

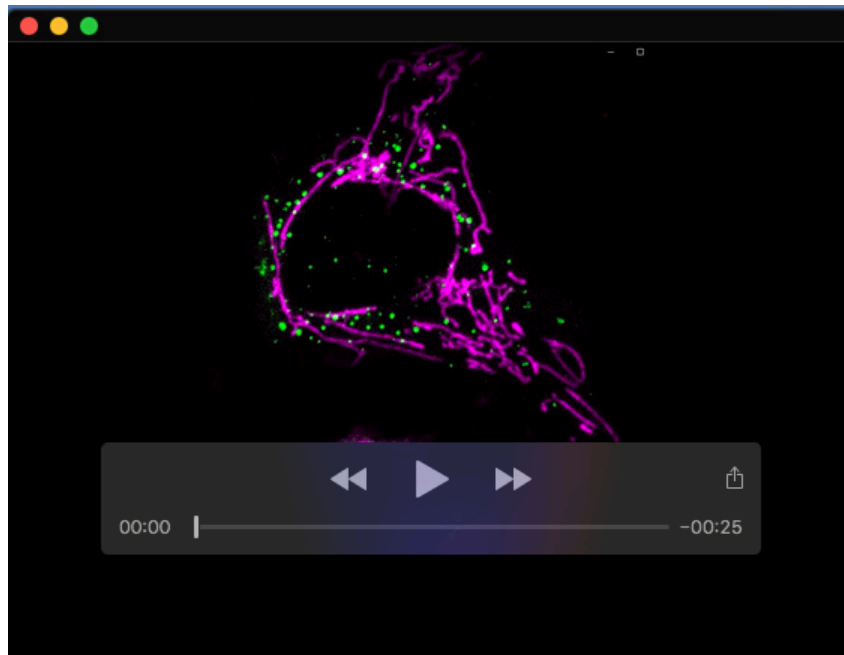

**Movie 2.** Live cell imaging of the control cell depicted in Figure 8A. Smaug1-EYFP (green) and Mito-dsRED (magenta) were co-transfected. One frame each 2 min during 32 min.



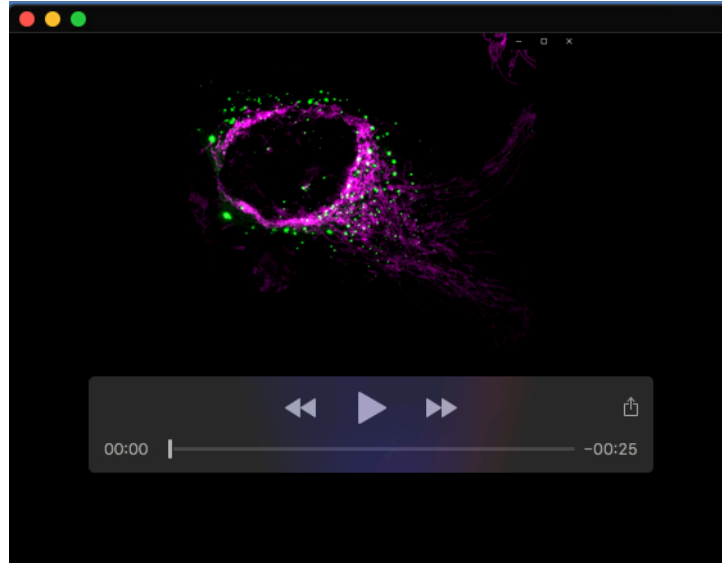

**Movie 3.** Live cell imaging of the metformin-exposed cell depicted in Figure 8A. Smaug1-EYFP (green) and Mito-dsRED (magenta) were co-transfected. One frame each 2 min during 32 min.
